# Supplementary material
Source: PubMed Central journal article supplement (PMC2756086)

## Supporting Information

### **Design and Microwave-Assisted Synthesis of Novel Macrocyclic Peptides Active at Melanocortin Receptors: Discovery of Potent and Selective hMC5R Receptor Antagonists**

Paolo Grieco<sup>a,b</sup>#, Minying Cai<sup>a</sup>#, Lu Liu<sup>a</sup>, Alexander Mayorov<sup>a</sup>, Kevin Chandler<sup>a</sup>, Dev Trivedi<sup>a</sup>, Guanxin Lin<sup>a</sup>, Pietro Campiglia<sup>c</sup>, Ettore Novellino<sup>b</sup> and Victor J. Hruby<sup>a\*</sup>

<sup>a</sup>*Department of Chemistry, University of Arizona, Tucson, AZ 85721 USA*

<sup>b</sup>*Department of Pharmaceutical Chemistry and Toxicology, University of Napoli "Federico II", Naples, Italy*

<sup>c</sup>*Department of Pharmaceutical Science, University of Salerno, Fisciano, Salerno, Italy*

PG29N (45 observable hydrogens)

Amide and aromatic hydrogens (26)

9.13 (d,  $J = 8.39$  Hz, 1H)

8.97 (broad s, 1H)

8.59 (d,  $J = 9.02$  Hz, 1H)

8.50 (d,  $J = 4.71$  Hz, 1H)

8.26 (dd,  $J = 8.77, 2.57$  Hz, 1H)

8.04 (d,  $J = 8.21$  Hz, 1H)

7.89 (d,  $J = 2.60$  Hz, 1H)

7.79 (d,  $J = 6.57$  Hz, 1H)

7.76 (d,  $J = 8.94$  Hz, 1H)

7.58 (s, 1H)

7.42 (s, 1H)

7.30 (m, 2H)

7.24 (m, 6H)

7.20-7.16 (m, 5H)

7.14 (m, 2H)

$\alpha$ -Hydrogens (8)

4.81 (dt,  $J = 8.86, 5.31$  Hz, 1H)

4.74 (q,  $J = 7.32$  Hz, 1H)

4.50-4.44 (m, 1H)

4.43-4.36 (m, 1H)

3.75 (q,  $J = 7.18$  Hz, 1H)

3.55-3.47 (m, 1H)

3.31-3.23 (m, 1H)

3.20 (dd,  $J = 15.26, 4.88$  Hz, 1H)

Side chain hydrogens (11)

2.94-2.80 (m, 5H)

2.74-2.65 (m, 1H)

1.34-1.16 (m, 3H)

1.00 (m, 1H)

0.77 (m, 1H)

PG29N

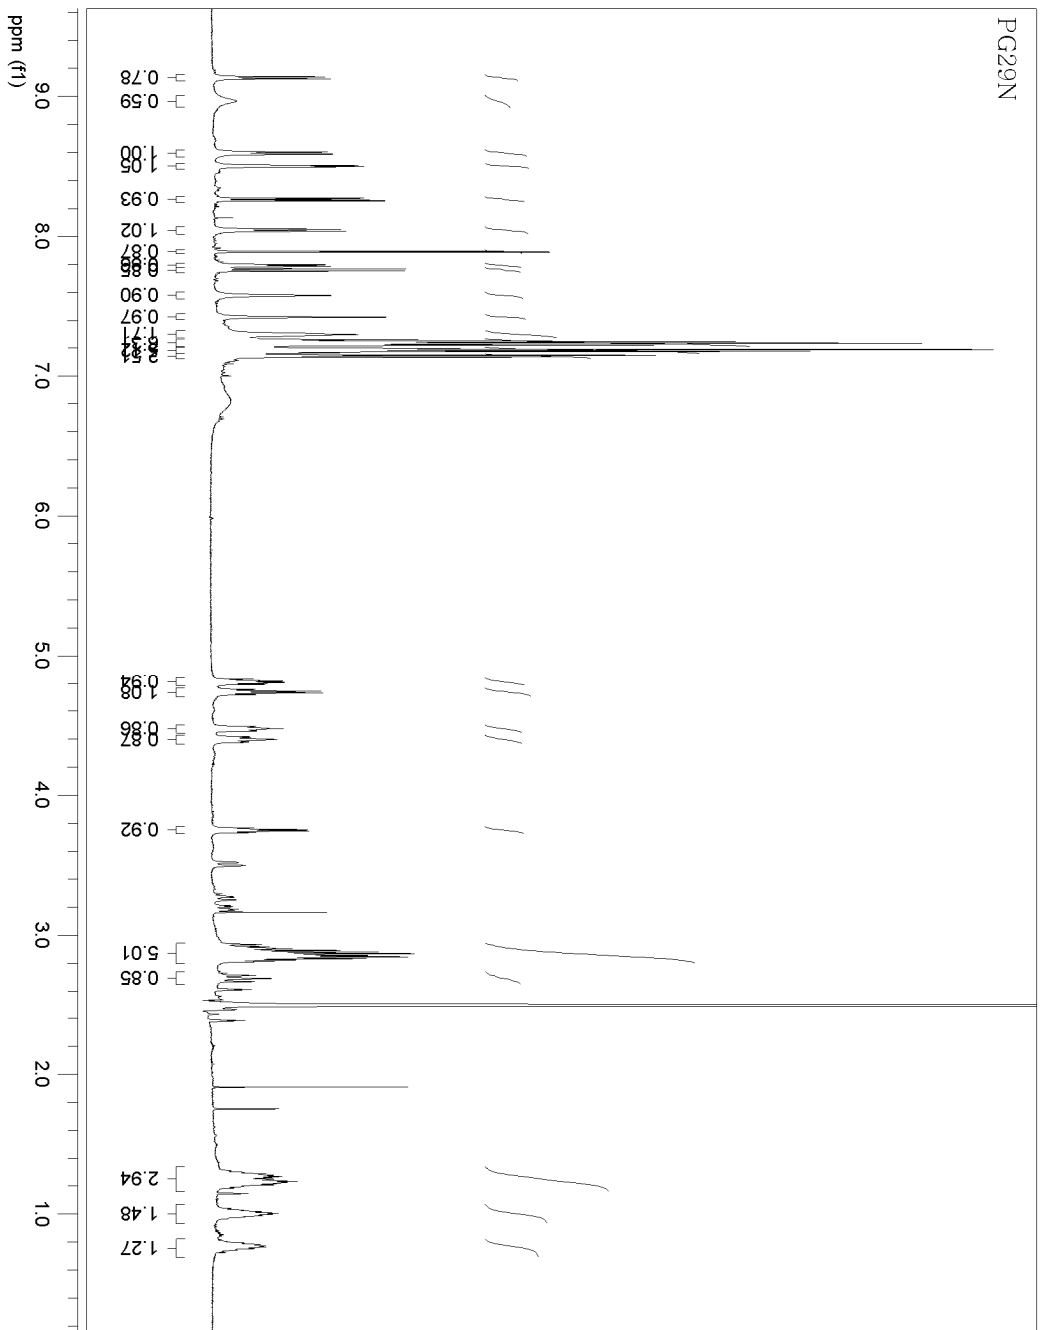

PG28N (52 observable hydrogens)

Amide and aromatic hydrogens (32)

8.97 (broad s, 1H)

8.82 (d,  $J = 8.05$  Hz, 1H)

8.61 (d,  $J = 5.94$  Hz, 1H)

8.39 (d,  $J = 7.18$  Hz, 1H)

8.27 (dd,  $J = 8.85, 2.54$  Hz, 1H)

8.15 (d,  $J = 2.54$  Hz, 1H)

7.95 (d,  $J = 7.74$  Hz, 1H)

7.84 (d,  $J = 7.50$  Hz, 1H)

7.74 (m, 5H)

7.63 (s, 1H)

7.46 (m, 4H)

7.31 (m, 5H)

7.24 (m, 4H)

7.18 (m, 2H)

7.13 (m, 3H)

$\alpha$ -Hydrogens (6)

4.90 (q,  $J = 7.15$  Hz, 1H)

4.47 (m, 1H)

4.38 (m, 2H)

3.89 (m, 1H)

3.65 (m, 1H)

Side chain hydrogens (14)

3.12 (m, 2H)

3.06 (m, 1H)

2.98 (m, 1H)

2.89 (d, 2H)

2.77 (m, 2H)

1.54 (m, 1H)

1.28 (m, 1H)

1.17 (m, 1H)

1.01 (m, 3H)

PG28N

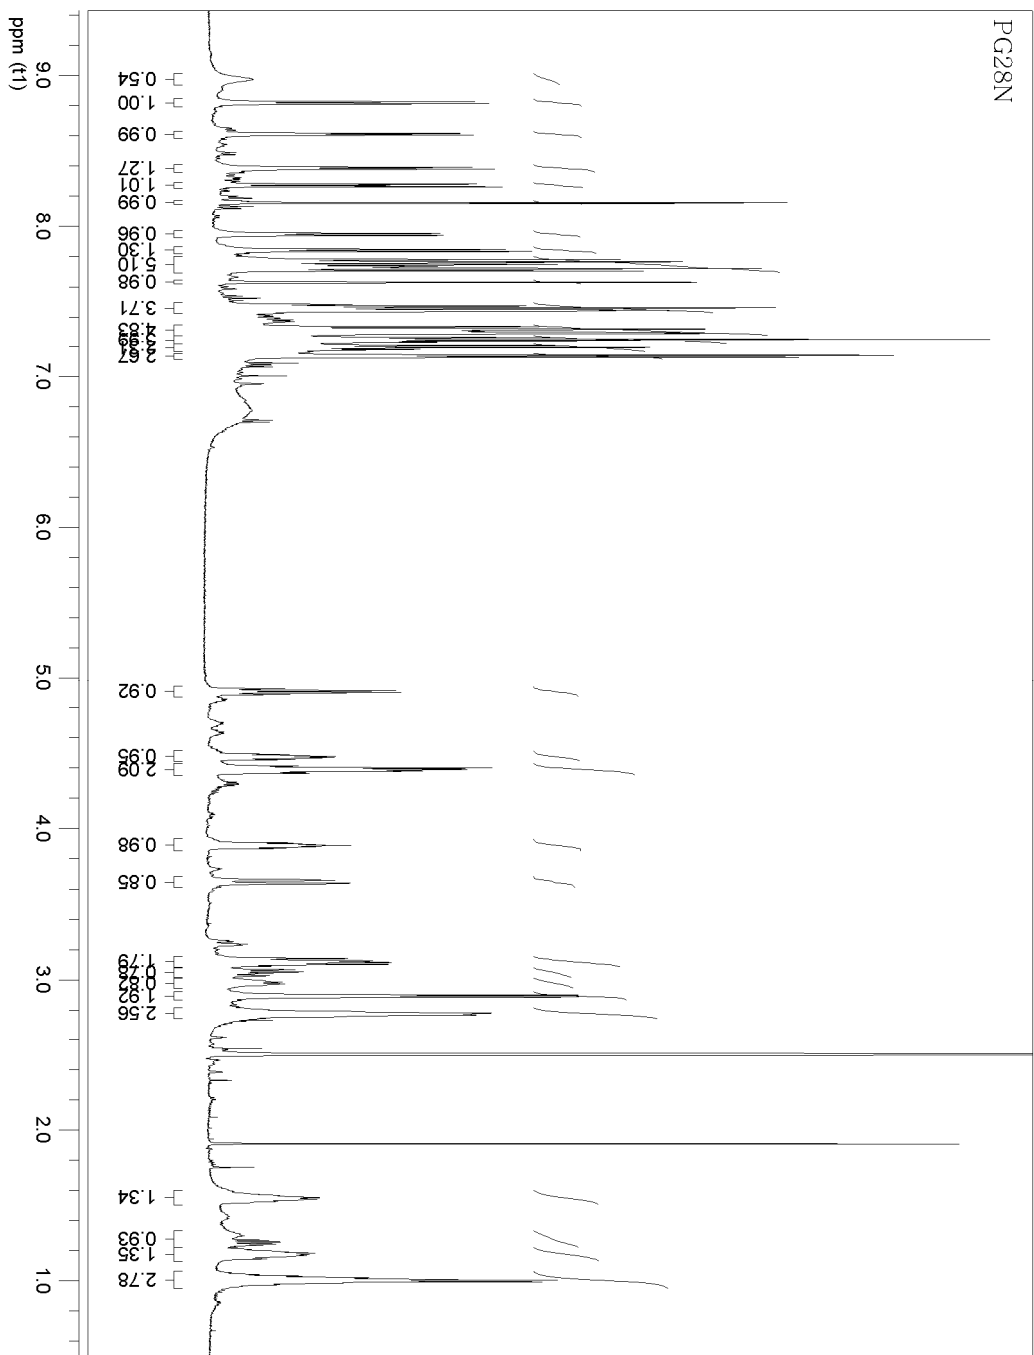

PG26N (61 observable hydrogens)

Amide and aromatic hydrogens (34)

9.01 (d,  $J = 4.95$  Hz, 1H)

8.76 (t,  $J = 6.90$  Hz, 1H)

8.72 (d,  $J = 6.03$  Hz, 1H)

8.68 (d,  $J = 5.96$  Hz, 1H)

8.48 (d,  $J = 7.92$  Hz, 1H)

8.44 (d,  $J = 8.11$  Hz, 1H)

8.24 (dt,  $J = 2.56, 9.00$  Hz, 1H)

8.11 (t,  $J = 2.28$  Hz, 1H)

7.83 (d,  $J = 7.43$  Hz, 1H)

7.77 (d,  $J = 7.67$  Hz, 1H)

7.74 (d,  $J = 7.86$  Hz, 1H)

7.68 (dd,  $J = 9.06, 4.52$  Hz, 1H)

7.63 (m, 4H)

7.44 (s, 1H)

7.36 (m, 2H)

7.29 (m, 4H)

7.21 (m, 6H)

7.05 (m, 1H)

6.96 (m, 1H)

6.90 (m, 1H)

6.59 (m, 2H)

$\alpha$ -Hydrogens (7)

4.85 (q,  $J = 7.83$  Hz, 1H)

4.39 (m, 3H)

4.25 (m, 1H)

4.14 (m, 1H)

3.63 (m, 1H)

Side chain hydrogens (20)

3.09 (m, 3H)

2.97 (m, 2H)

2.91 (m, 1H)

2.64 (m, 3H)

2.19 (m, 1H)

2.00 (m, 1H)

1.84 (m, 3H)

1.40 (m, 2H)

1.26 (m, 4H)

PG26N

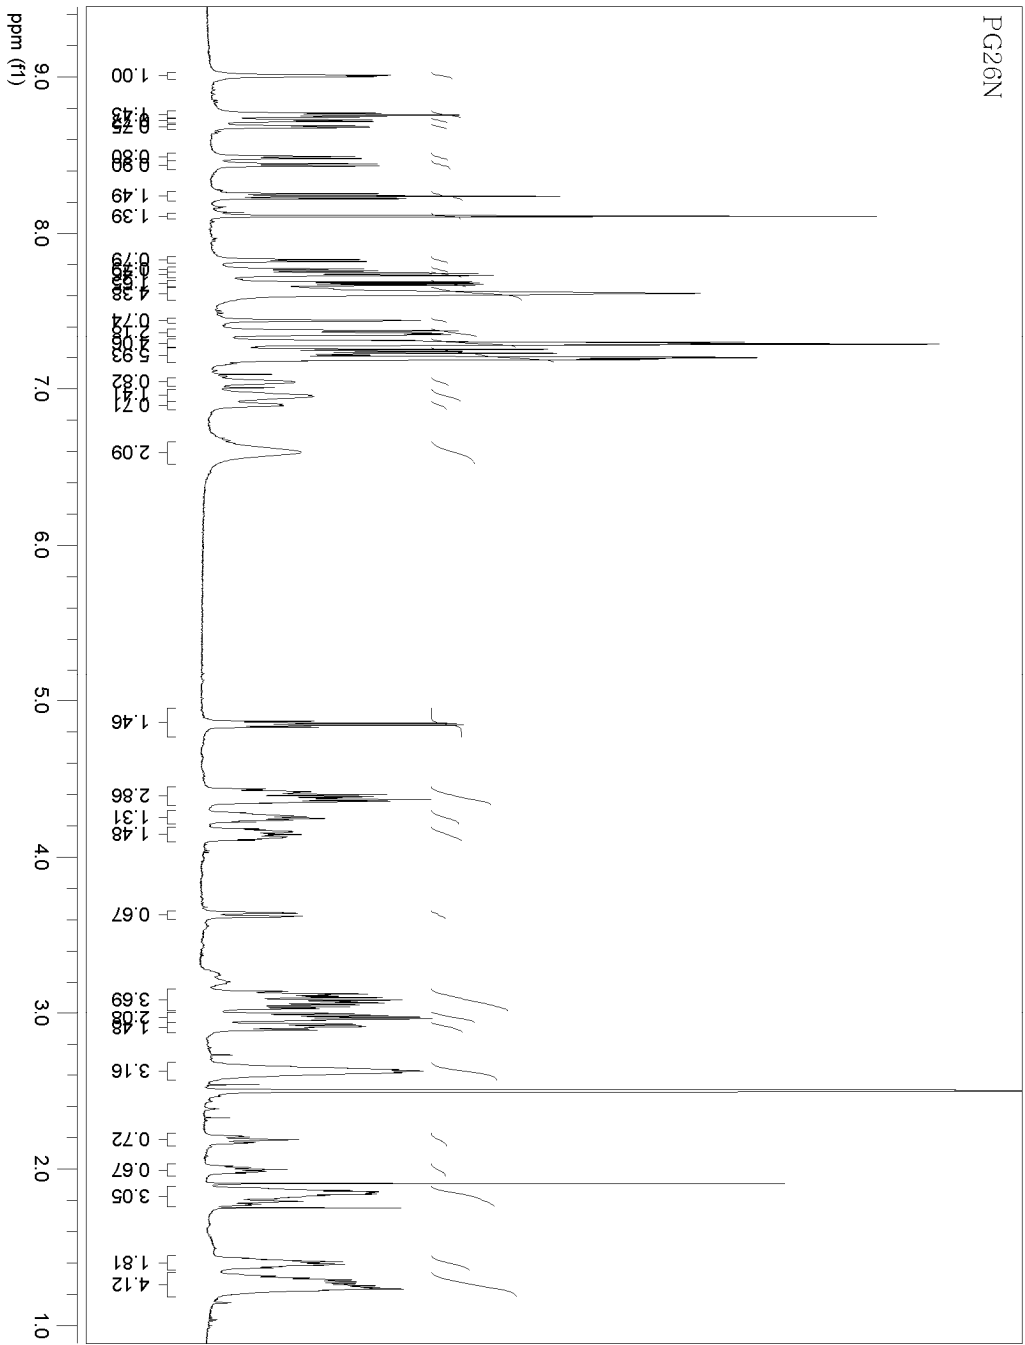

PG23N (53 observable hydrogens)

Amide and aromatic hydrogens (27)

9.01 (d,  $J = 5.32$  Hz, 1H)

8.79 (t,  $J = 6.96$  Hz, 1H)

8.68 (d,  $J = 6.02$  Hz, 1H)

8.63 (d,  $J = 5.97$  Hz, 1H)

8.42 (d,  $J = 7.44$  Hz, 1H)

8.35 (d,  $J = 7.85$  Hz, 1H)

8.24 (dt,  $J = 2.58, 9.14$  Hz, 1H)

8.12 (d,  $J = 2.34$  Hz, 1H)

7.88 (d,  $J = 7.33$  Hz, 1H)

7.79 (t,  $J = 6.94$  Hz, 2H)

7.67 (dd,  $J = 9.07, 2.51$  Hz, 1H)

7.37 (m, 2H)

7.29 (m, 5H)

7.22 (m, 2H)

7.17 (m, 4H)

7.06 (m, 1H)

7.01 (m, 1H)

$\alpha$ -Hydrogens (6)

4.86 (m, 1H)

4.39 (m, 2H)

4.34 (m, 1H)

4.24 (m, 1H)

4.10 (m, 1H)

Side chain hydrogens (20)

3.12 (m, 2H)

3.06 (m, 1H)

2.96 (m, 2H)

2.90 (m, 1H)

2.75 (m, 3H)

2.23 (m, 1H)

2.03 (m, 1H)

1.91 (m, 1H)

1.81 (m, 1H)

1.69 (m, 2H)

1.36 (m, 2H)

1.05 (m, 3H)



PG23N

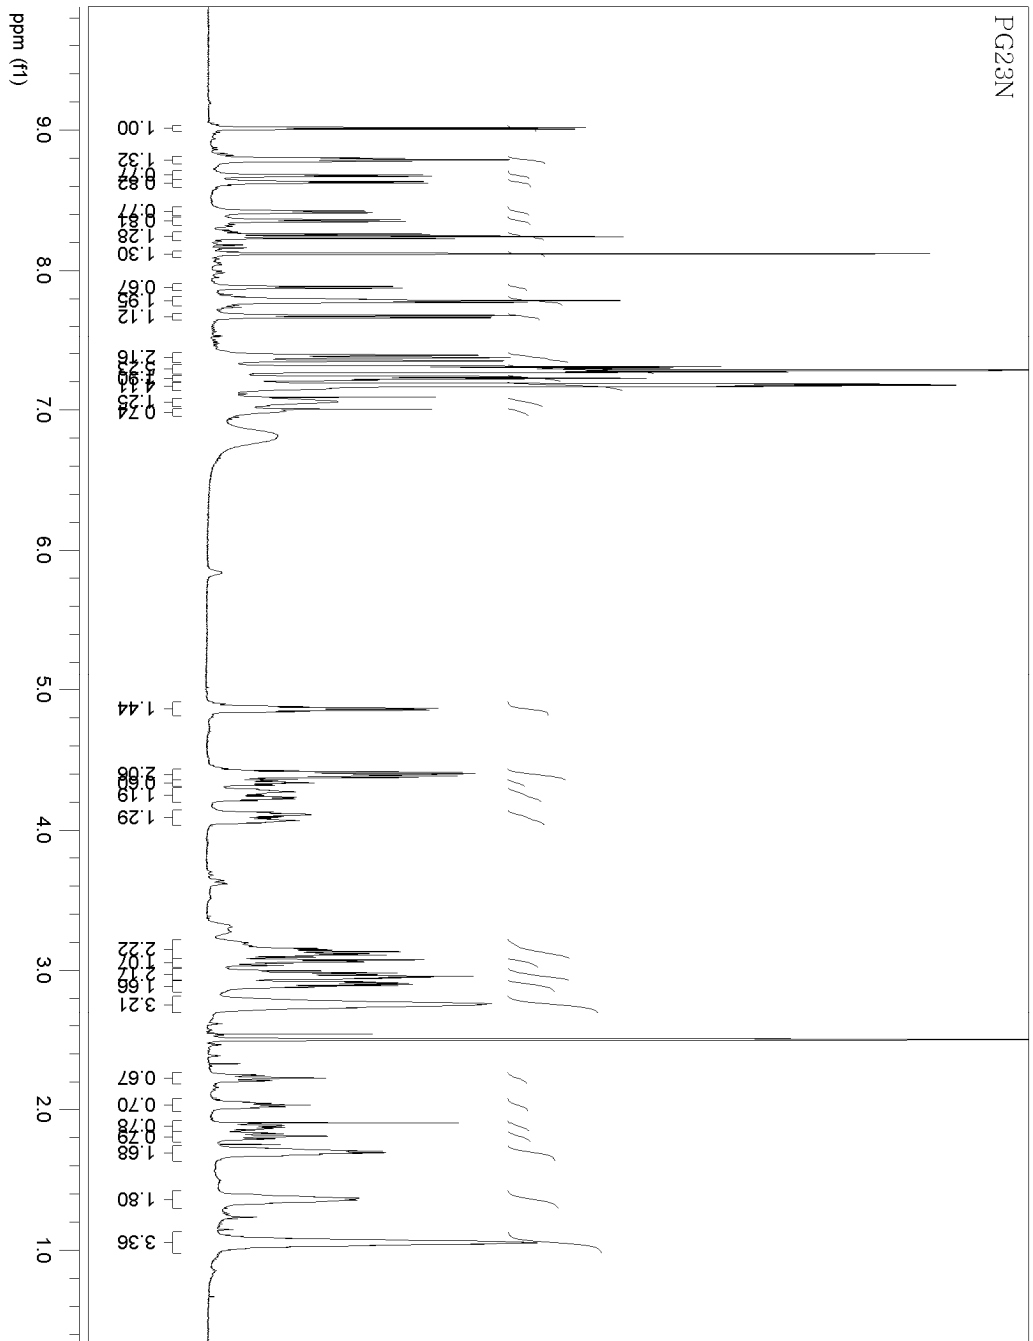

PG27N (42 observable hydrogens)

Amide and aromatic hydrogens (26)

9.12 (1H, d,  $J=8.43$  Hz)

8.99 (1H, s)

8.60 (1H, d,  $J=8.92$  Hz)

8.47 (1H, d,  $J=4.85$  Hz)

8.28 (1H, dd,  $J=2.53, 8.75$  Hz)

8.08 (1H, d,  $J=7.89$  Hz)

7.90 (1H, d,  $J=2.55$  Hz)

7.85 (1H, d,  $J=7.79$  Hz)

7.80 (3H, d,  $J=8.27$  Hz)

7.76 (1H, d,  $J=8.94$  Hz)

7.67 (1H, s)

7.55 (1H, s)

7.46 (3H, m)

7.36 (1H, d,  $J=8.39$  Hz)

7.29 (1H, t,  $J=5.12$  Hz)

7.22 (4H, m)

7.17 (1H, m)

7.12 (2H, d,  $J=7.11$  Hz)

$\alpha$ -Hydrogens (7)

4.82 (1H, dt,  $J=5.42, 8.95$  Hz)

4.68 (1H, q,  $J=7.33$  Hz)

4.47 (2H, t,  $J=9.74$  Hz)

3.74 (1H, dd,  $J=6.97, 12.41$  Hz)

3.26 (1H, dd,  $J=10.77, 14.58$  Hz)

3.19 (1H, dd,  $J=4.99, 15.19$  Hz)

Side chain hydrogens (9)

2.92 (2H, m)

2.84 (1H, m)

2.60 (2H, m)

1.26 (1H, m)

1.14 (1H, m)

0.94 (1H, m)

0.73 (1H, m)

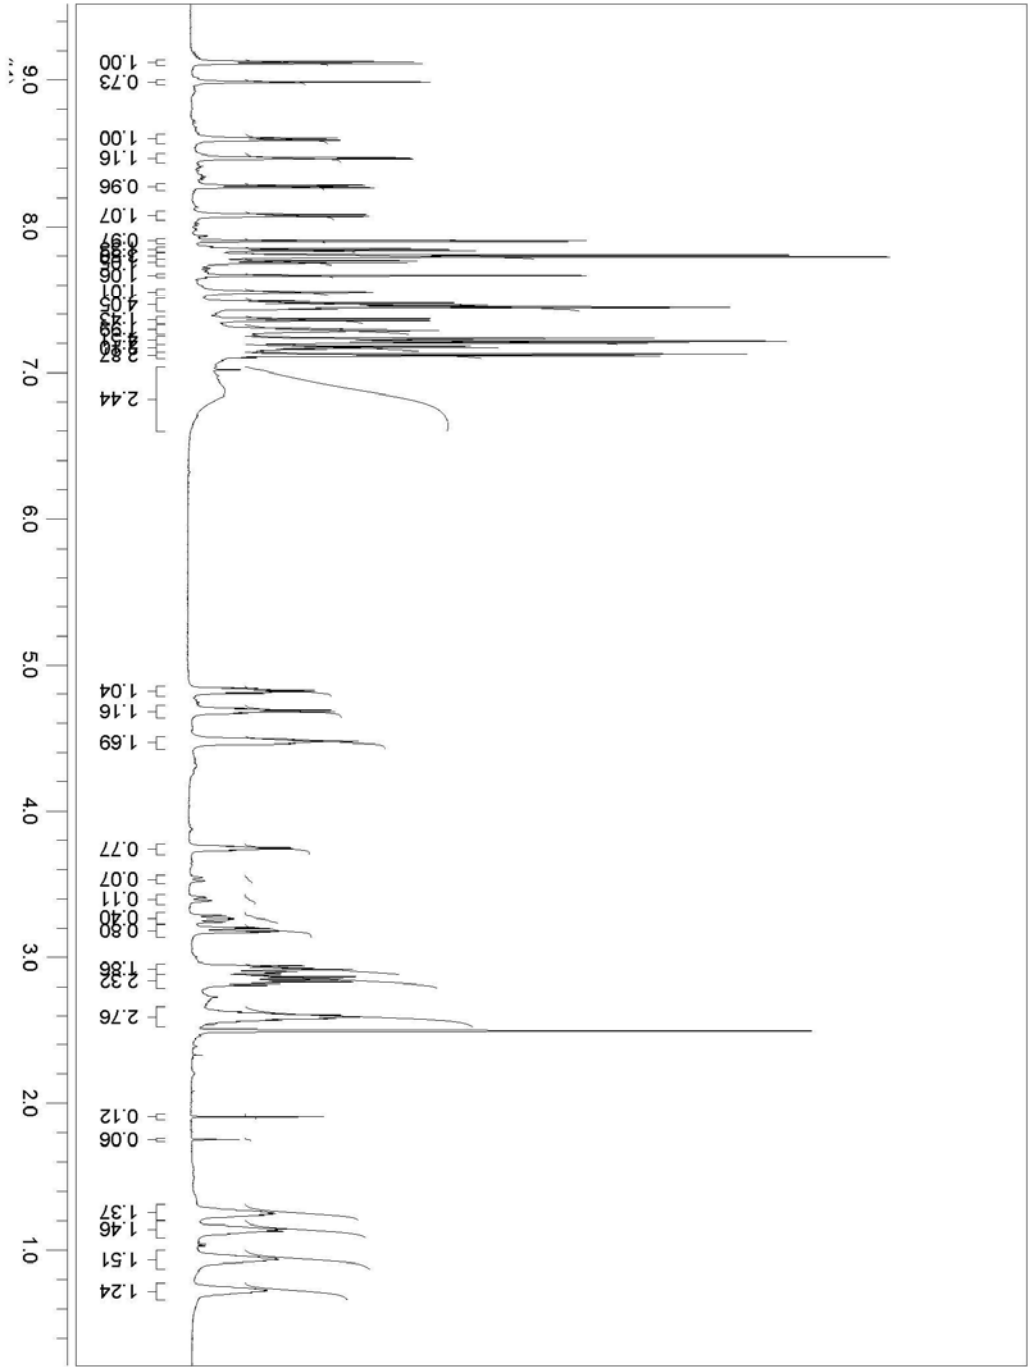

PG11N (66 observable hydrogens)

Amide and aromatic hydrogens (38)

10.79 (1H, d,  $J=1.79$  Hz)

9.41 (1H, s)

8.43 (1H, d,  $J=6.17$  Hz)

8.27 (1H, dd,  $J=2.55, 8.82$  Hz)

8.21 (1H, d,  $J=2.54$  Hz)

7.90 (1H, d,  $J=6.77$  Hz)

7.78 (1H, d,  $J=8.95$  Hz)

7.76 (1H, d,  $J=7.25$  Hz)

7.58 (1H, d,  $J=7.02$  Hz)

7.54 (1H, d,  $J=8.32$  Hz)

7.33 (1H, d,  $J=8.21$  Hz)

7.28 (5H, m)

7.21 (4H, m)

7.17 (12H, m)

7.13 (2H, m)

7.07 (3H, m)

6.99 (1H, t,  $J=7.74$  Hz)

$\alpha$ -Hydrogens (7)

4.59 (1H, q,  $J=7.05$  Hz)

4.49 (1H, m)

4.33 (1H, m)

4.24 (1H, ddd,  $J=3.46, 7.35, 10.78$  Hz)

3.90 (1H, dd,  $J=5.49, 9.43$  Hz)

3.87 (1H, d,  $J=16.63$  Hz)

3.69 (1H, dd,  $J=3.05, 13.64$  Hz)

Side chain hydrogens (21)

3.26 (1H, d,  $J=16.57$  Hz)

3.19 (3H, m)

3.08 (2H, m)

3.00 (2H, dd,  $J=7.71, 13.83$  Hz)

2.88 (3H, m)

2.54 (1H, s)

1.91 (1H, s)

1.49 (2H, m)

1.36 (3H, m)

1.24 (1H, m)

1.17 (2H, m)

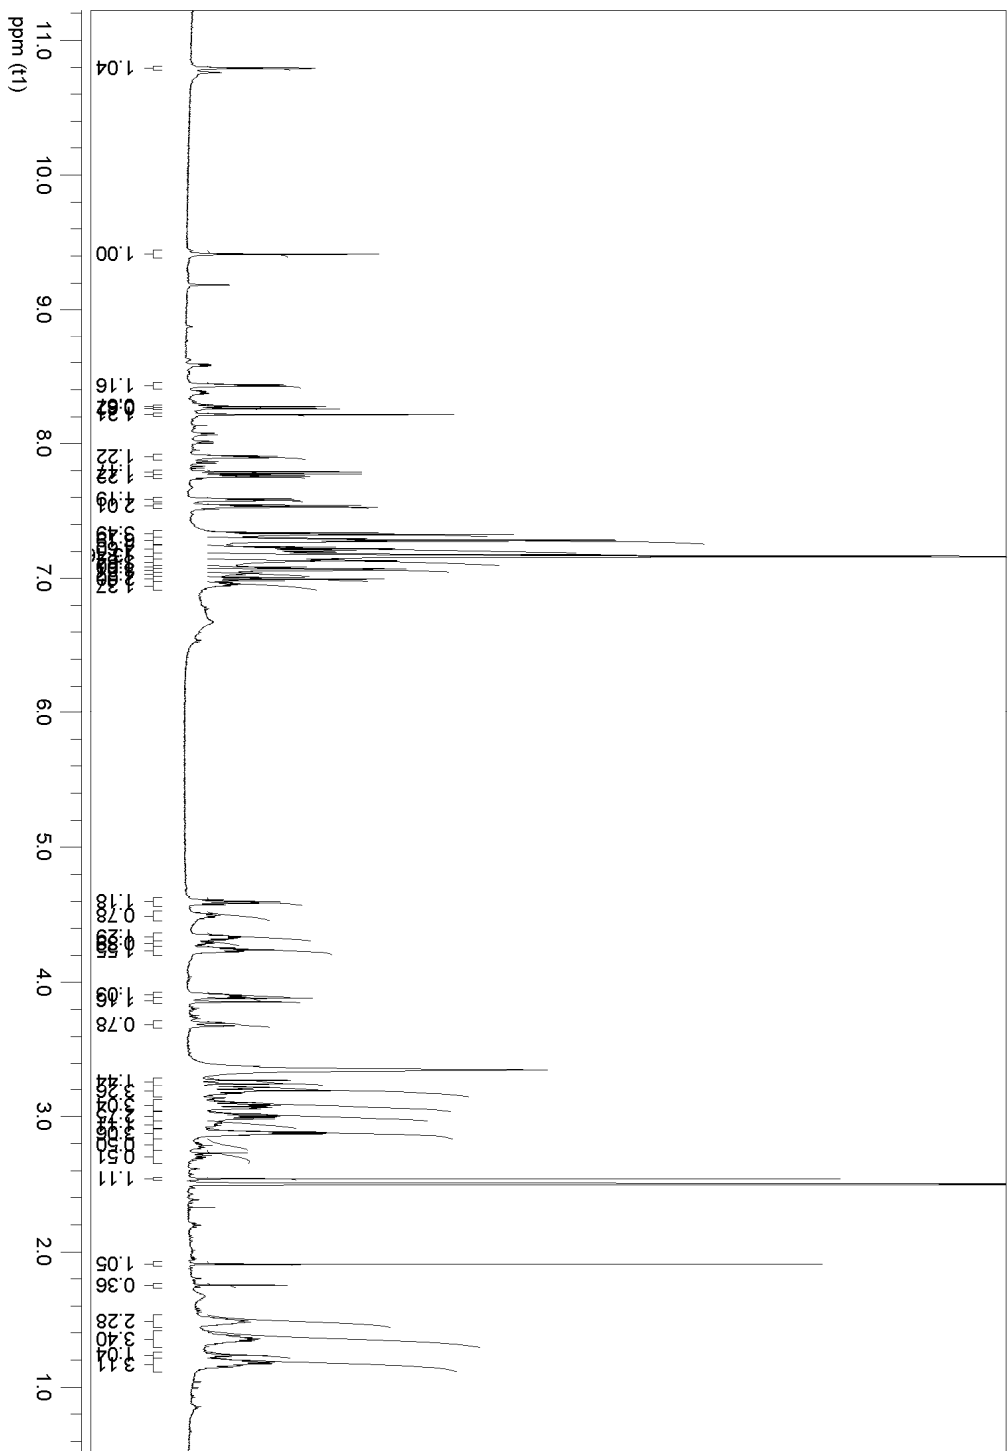

PG13N (96 observable hydrogens)

Amide and aromatic hydrogens (38)

9.09 (2H, d,  $J=6.12$  Hz)

8.43 (1H, d,  $J=6.09$  Hz)

8.31 (1H, d,  $J=6.44$  Hz)

8.27 (1H, d,  $J=2.53$  Hz)

8.26 (1H, d,  $J=2.52$  Hz)

8.24 (2H, m)

7.91 (1H, d,  $J=6.82$  Hz)

7.85 (1H, d,  $J=7.47$  Hz)

7.82 (1H, d,  $J=7.29$  Hz)

7.76 (1H, d,  $J=7.74$  Hz)

7.74 (2H, d,  $J=8.88$  Hz)

7.70 (1H, d,  $J=6.91$  Hz)

7.64 (1H, d,  $J=7.10$  Hz)

7.41 (2H, m)

7.29 (8H, m)

7.20 (8H, m)

7.15 (2H, s)

7.09 (2H, s)

7.00 (2H, s)

$\alpha$ -Hydrogens (9)

4.63 (2H, m)

4.30 (1H, ddd,  $J=3.40, 7.68, 10.89$  Hz)

4.23 (1H, ddd,  $J=3.52, 7.32, 10.85$  Hz)

4.15 (2H, m)

4.07 (1H, m)

4.02 (1H, td,  $J=6.00, 9.85$  Hz)

3.66 (1H, dt,  $J=2.93, 14.32$  Hz)

Side chain hydrogens (49)

3.20 (2H, m)

3.12 (3H, m)

3.00 (6H, m)

2.67 (2H, m)

2.35 (1H, m)

2.22 (1H, td,  $J=7.94, 13.15$  Hz)

2.10 (1H, m)

2.00 (2H, m)

1.91 (2H, m)

1.82 (6H, m)

1.64 (17H, m)

1.39 (6H, m)

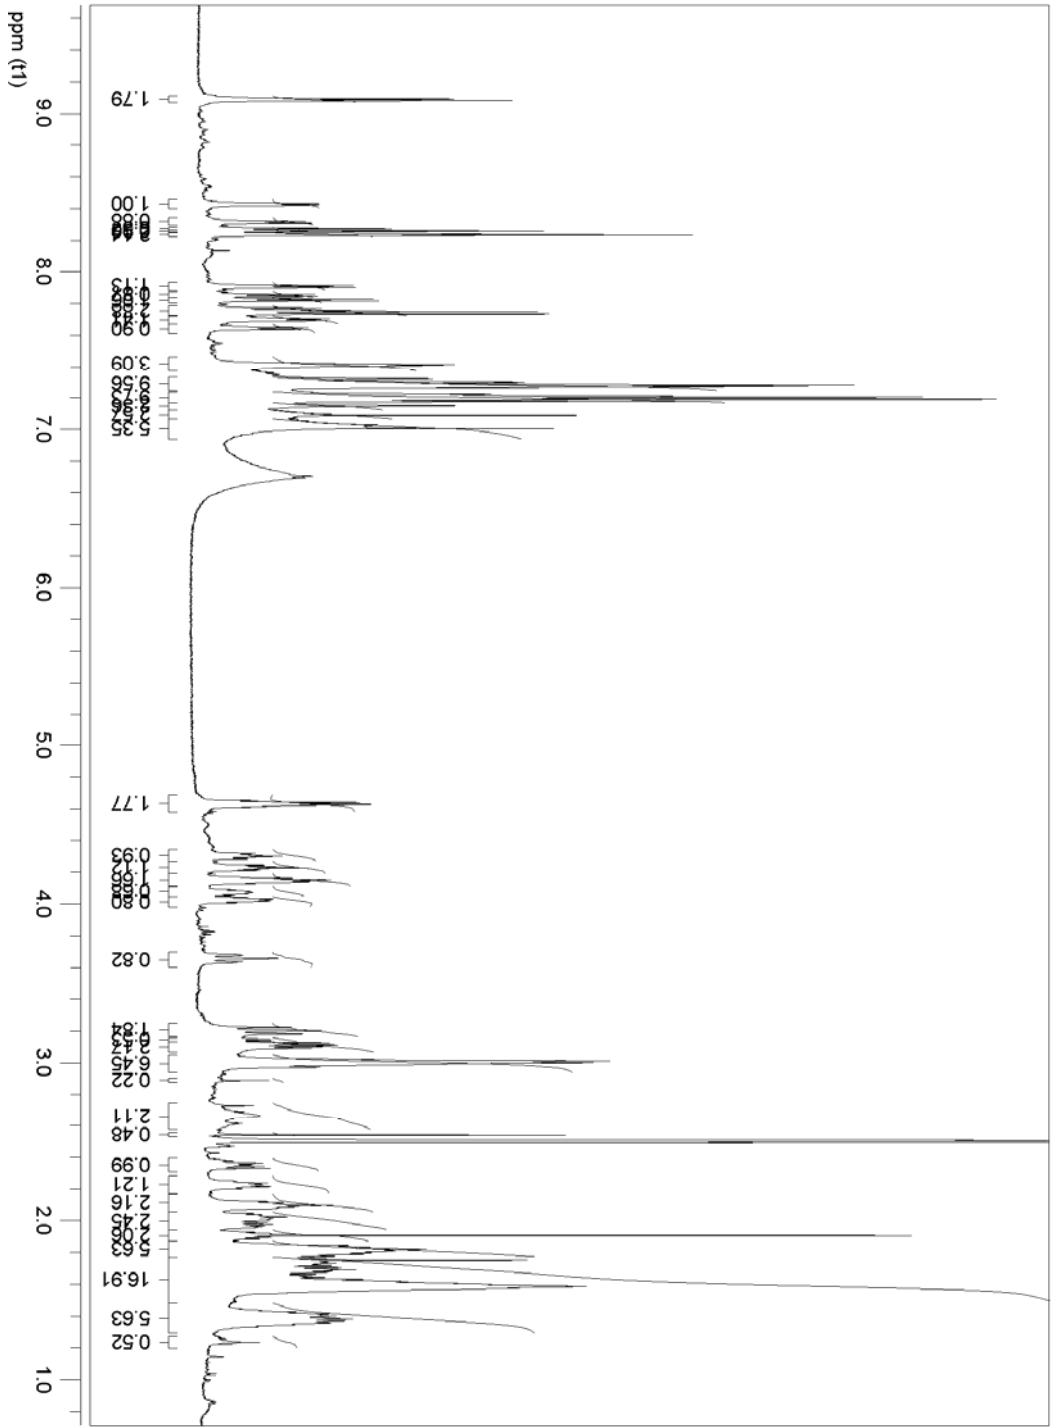

PG14N (56 observable hydrogens)

Amide and aromatic hydrogens (24)

10.76 (1H, d,  $J=1.83$  Hz)

8.86 (1H, d,  $J=5.05$  Hz)

8.72 (1H, d,  $J=7.37$  Hz)

8.33 (1H, d,  $J=7.24$  Hz)

8.27 (2H, m)

7.94 (1H, d,  $J=7.00$  Hz)

7.63 (2H, d,  $J=8.68$  Hz)

7.50 (1H, d,  $J=7.92$  Hz)

7.38 (1H, s)

7.29 (1H, d,  $J=8.10$  Hz)

7.25 (5H, m)

7.20 (3H, m)

7.11 (2H, d,  $J=1.27$  Hz)

7.04 (1H, t,  $J=7.45$  Hz)

6.94 (1H, t,  $J=7.47$  Hz)

$\alpha$ -Hydrogens (6)

4.62 (1H, q,  $J=7.54$  Hz)

4.38 (1H, q,  $J=7.19$  Hz)

4.33 (1H, m)

4.27 (1H, m)

3.94 (1H, m)

3.61 (1H, m)

Side chain hydrogens (26)

3.12 (1H, d,  $J=7.41$  Hz)

3.08 (1H, dd,  $J=9.89, 14.01$  Hz)

2.95 (2H, m)

2.73 (2H, m)

1.77 (1H, m)

1.62 (6H, m)

1.53 (2H, t,  $J=7.13$  Hz)

1.21 (3H, m)

1.13 (4H, m)

0.99 (2H, m)

0.87 (2H, m)



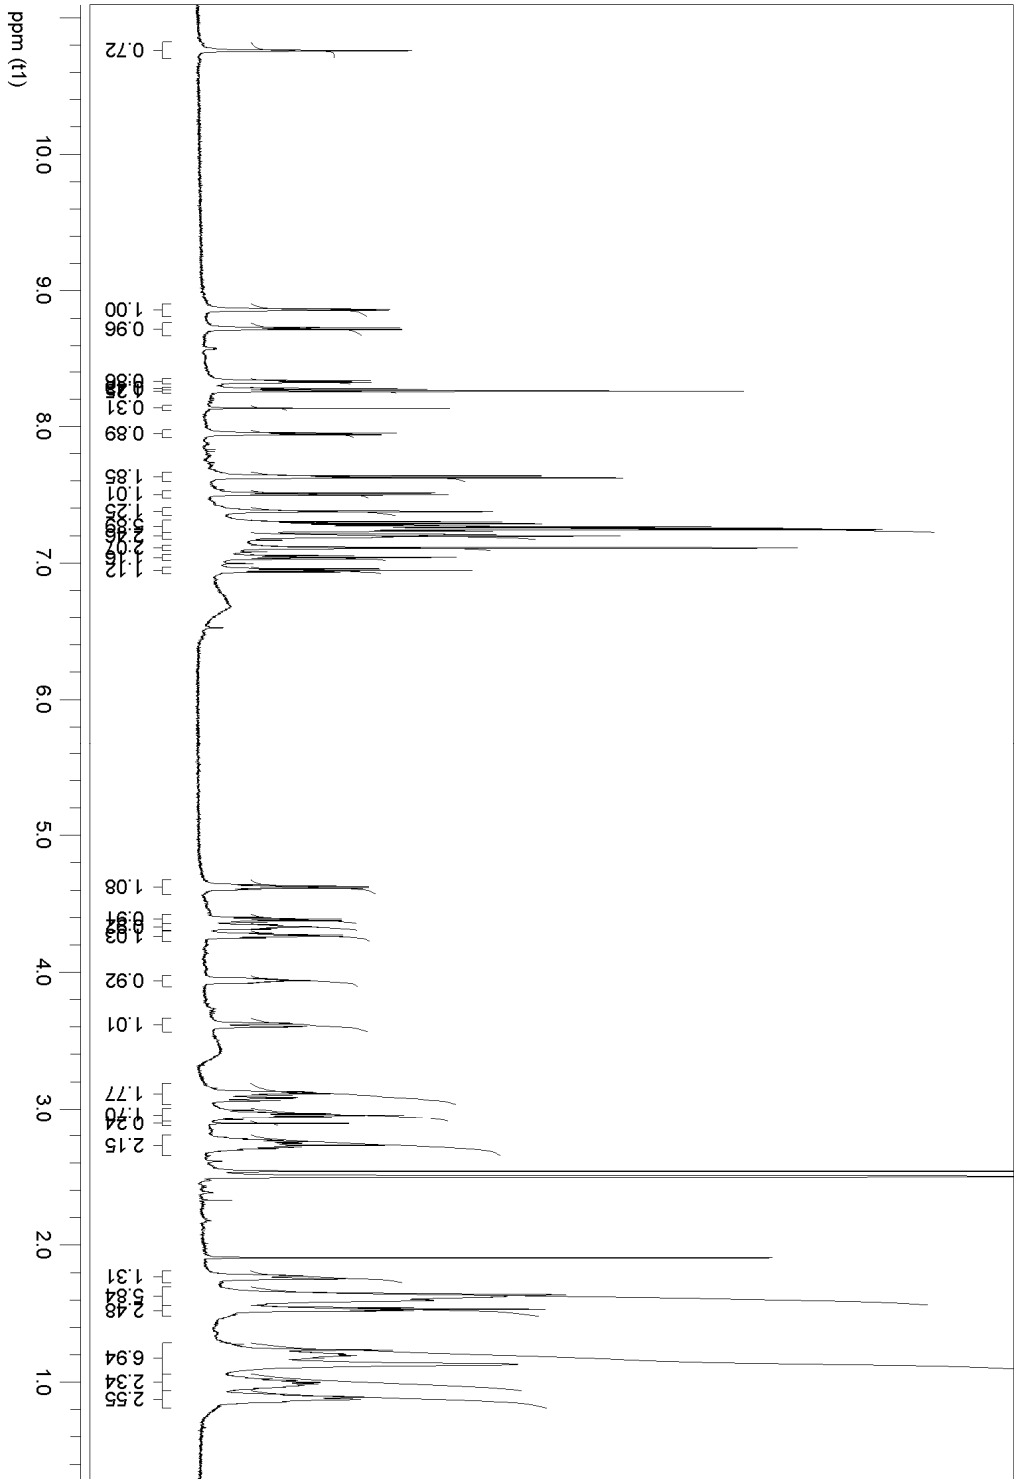

PG15N (49 observable hydrogens)

Amide and aromatic hydrogens (25)

10.74 (1H, d,  $J=1.78$  Hz)

8.59 (1H, d,  $J=4.73$  Hz)

8.29 (1H, dd,  $J=2.55, 8.80$  Hz)

8.19 (1H, d,  $J=2.57$  Hz)

7.85 (1H, d,  $J=8.94$  Hz)

7.59 (1H, d,  $J=7.31$  Hz)

7.54 (1H, d,  $J=6.45$  Hz)

7.49 (1H, d,  $J=7.84$  Hz)

7.37 (1H, s)

7.29 (7H, m)

7.20 (2H, t,  $J=7.29$  Hz)

7.14 (4H, m)

7.05 (2H, m)

6.95 (1H, t,  $J=7.45$  Hz)

$\alpha$ -Hydrogens (6)

4.82 (1H, q,  $J=7.06$  Hz)

4.54 (1H, dd,  $J=3.79, 8.98$  Hz)

4.27 (1H, m)

4.17 (1H, m)

3.89 (1H, dd,  $J=2.78, 14.35$  Hz)

3.76 (1H, m)

Side chain hydrogens (18)

3.19 (3H, m)

3.06 (1H, dd,  $J=6.79, 13.62$  Hz)

2.93 (1H, dd,  $J=7.11, 13.78$  Hz)

2.88 (3H, m)

2.17 (1H, m)

1.77 (3H, m)

1.55 (1H, m)

1.39 (1H, m)

1.30 (1H, m)

1.12 (3H, m)

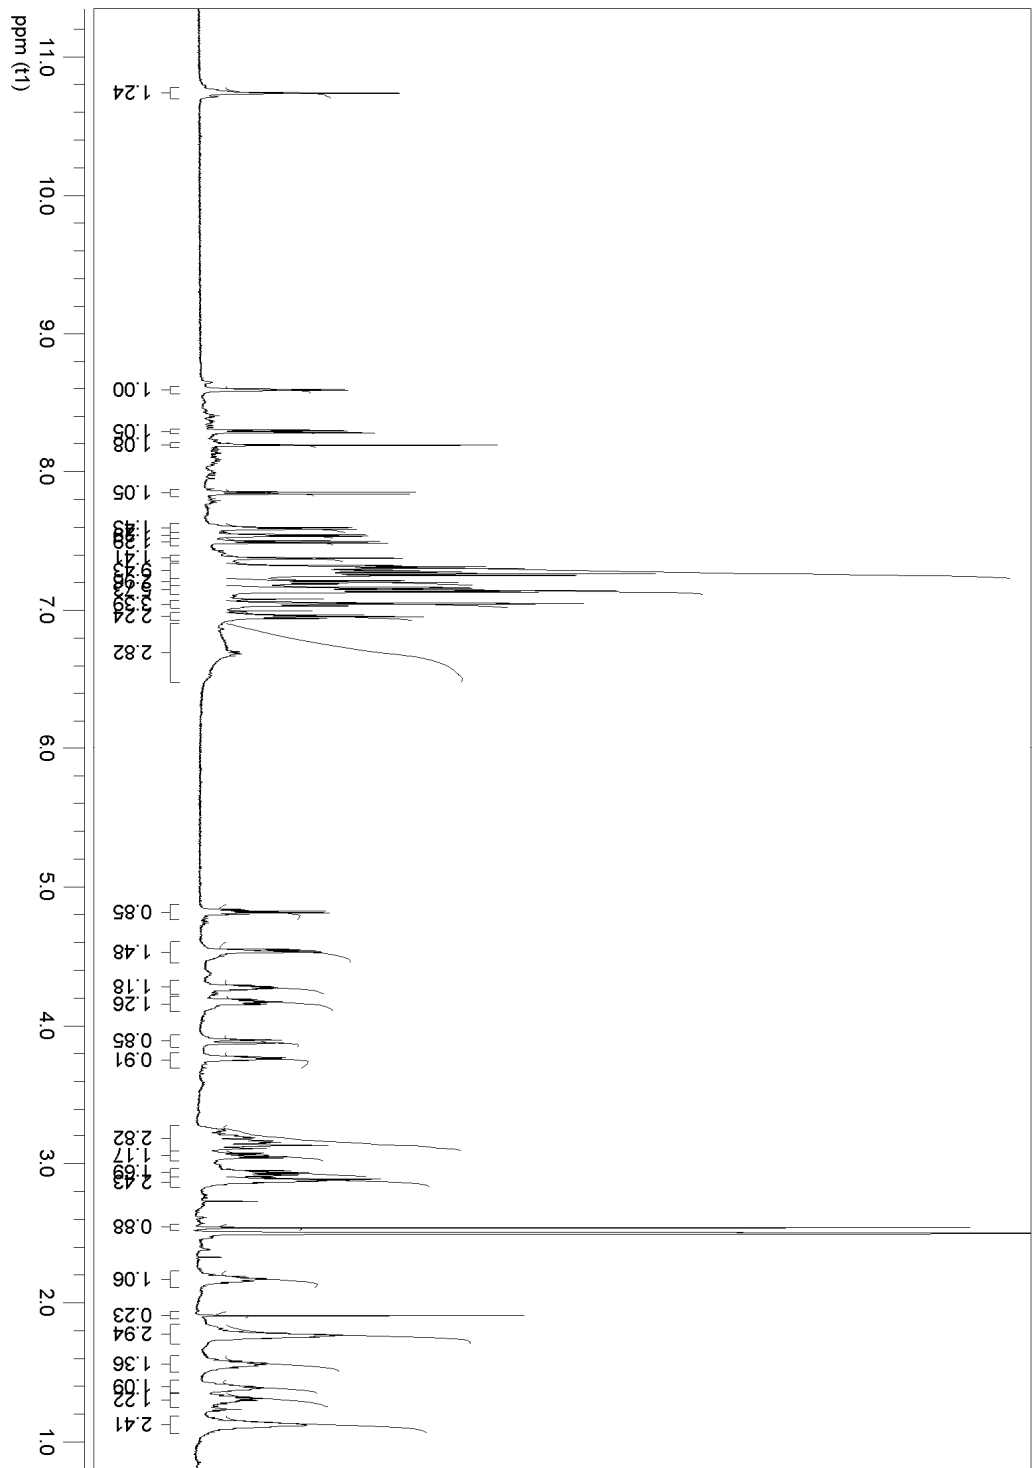

PG10N (58 observable hydrogens)

Amide and aromatic hydrogens (34)

10.75 (d,  $J = 1.80$  Hz, 1H)

8.84 (d,  $J = 7.91$  Hz, 1H)

8.64 (d,  $J = 5.62$  Hz, 1H)

8.43 (d,  $J = 7.12$  Hz, 1H)

8.27 (dd,  $J = 8.84, 2.56$  Hz, 1H)

8.15 (d,  $J = 2.52$  Hz, 1H)

7.80 (d,  $J = 7.28$  Hz, 1H)

7.75 (d,  $J = 6.41$  Hz, 1H)

7.68 (d,  $J = 9.07$  Hz, 1H)

7.49 (d,  $J = 7.87$  Hz, 1H)

7.39 (s, 1H)

7.28 (m, 8H)

7.20 (m, 3H)

7.16 (m, 4H)

7.12 (s, 2H)

7.08 (s, 2H)

7.04 (t,  $J = 7.49$  Hz, 2H)

6.95 (t,  $J = 7.37$  Hz, 2H)

$\alpha$ -Hydrogens (7)

4.88 (q,  $J = 7.70$  Hz, 1H)

4.36 (m, 4H)

3.92 (m, 1H)

3.62 (m, 1H)

Side chain hydrogens (17)

3.09 (m, 4H)

2.91 (d,  $J = 7.36$  Hz, 2H)

2.82 (dd,  $J = 12.65, 6.68$  Hz, 3H)

1.59 (m, 2H)

1.22 (m, 3H)

1.02 (m, 3H)

PG10N

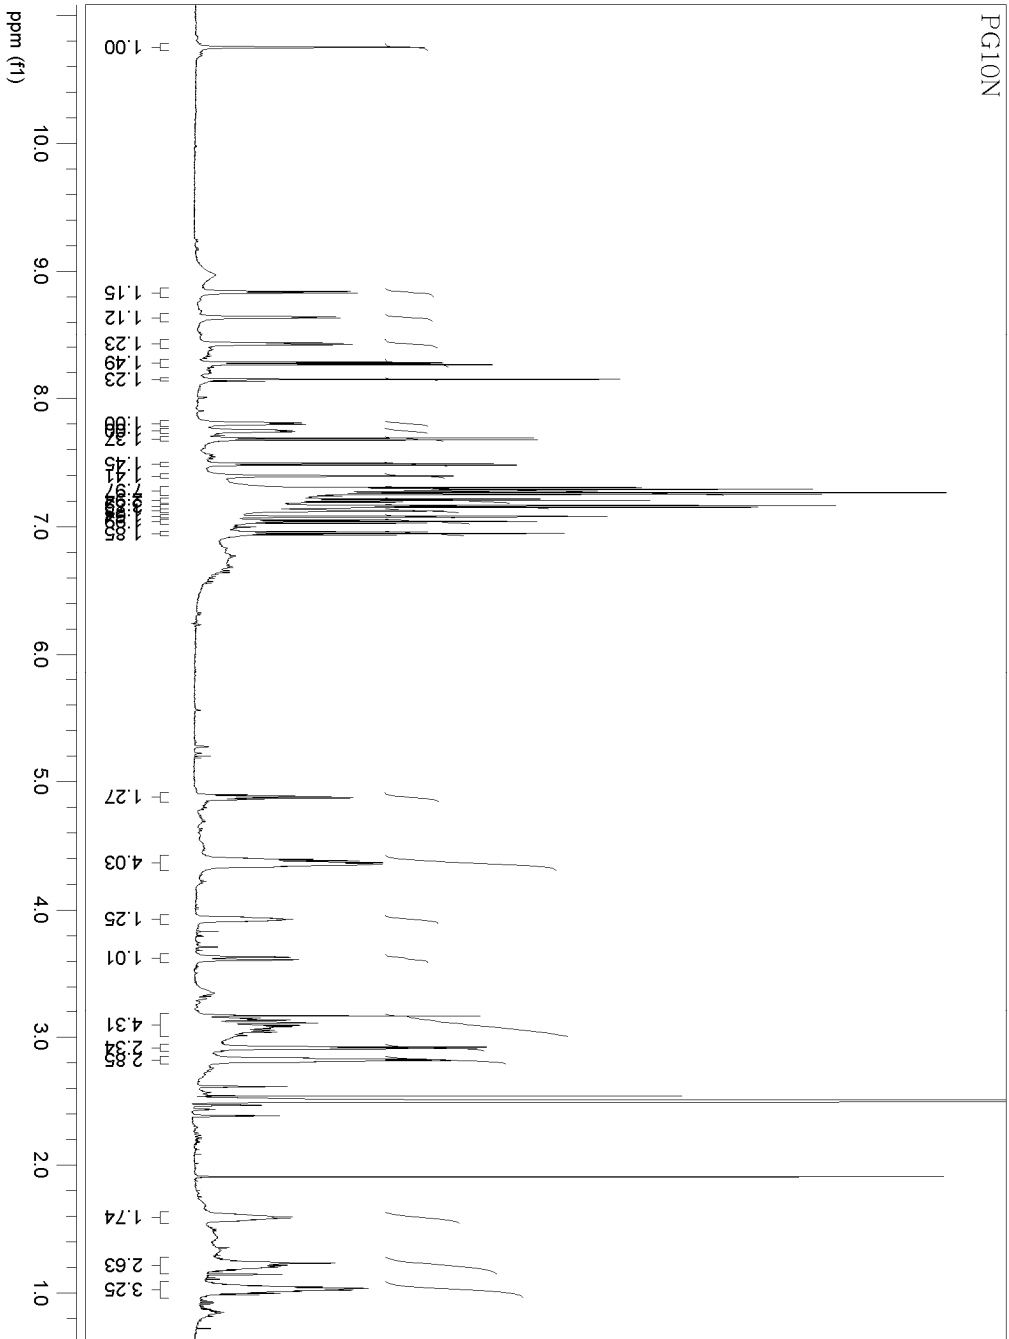

PG18N (44 observable hydrogens)

Amide and aromatic hydrogens (28)

10.81 (s, 1H)

9.16 (d,  $J = 7.49$  Hz, 1H)

9.03 (s, 1H)

8.30 (m, 2H)

8.15 (m, 2H)

7.96 (d,  $J = 8.05$  Hz, 1H)

7.82 (d,  $J = 6.20$  Hz, 1H)

7.76 (d,  $J = 9.04$  Hz, 1H)

7.61 (d,  $J = 8.14$  Hz, 2H)

7.54 (d,  $J = 7.88$  Hz, 1H)

7.43 (t,  $J = 4.99$  Hz, 2H)

7.39 (s, 3H)

7.29 (d,  $J = 8.08$  Hz, 2H)

7.24 (s, 1H)

7.15 (d,  $J = 1.84$  Hz, 1H)

7.07 (m, 2H)

7.01 (m, 4H)

$\alpha$ -Hydrogens (5)

4.62 (q,  $J = 7.84$  Hz, 1H)

4.52 (m, 1H)

4.48 (q,  $J = 7.03$  Hz, 1H)

4.42 (s, 1H)

3.93 (m, 1H)

Side chain hydrogens (11)

3.10 (m, 3H)

3.01 (m, 1H)

2.97 (q,  $J = 6.63$  Hz, 2H)

2.69 (m, 1H)

1.75 (m, 1H)

1.63 (m, 1H)

1.40 (m, 2H)

PG18N

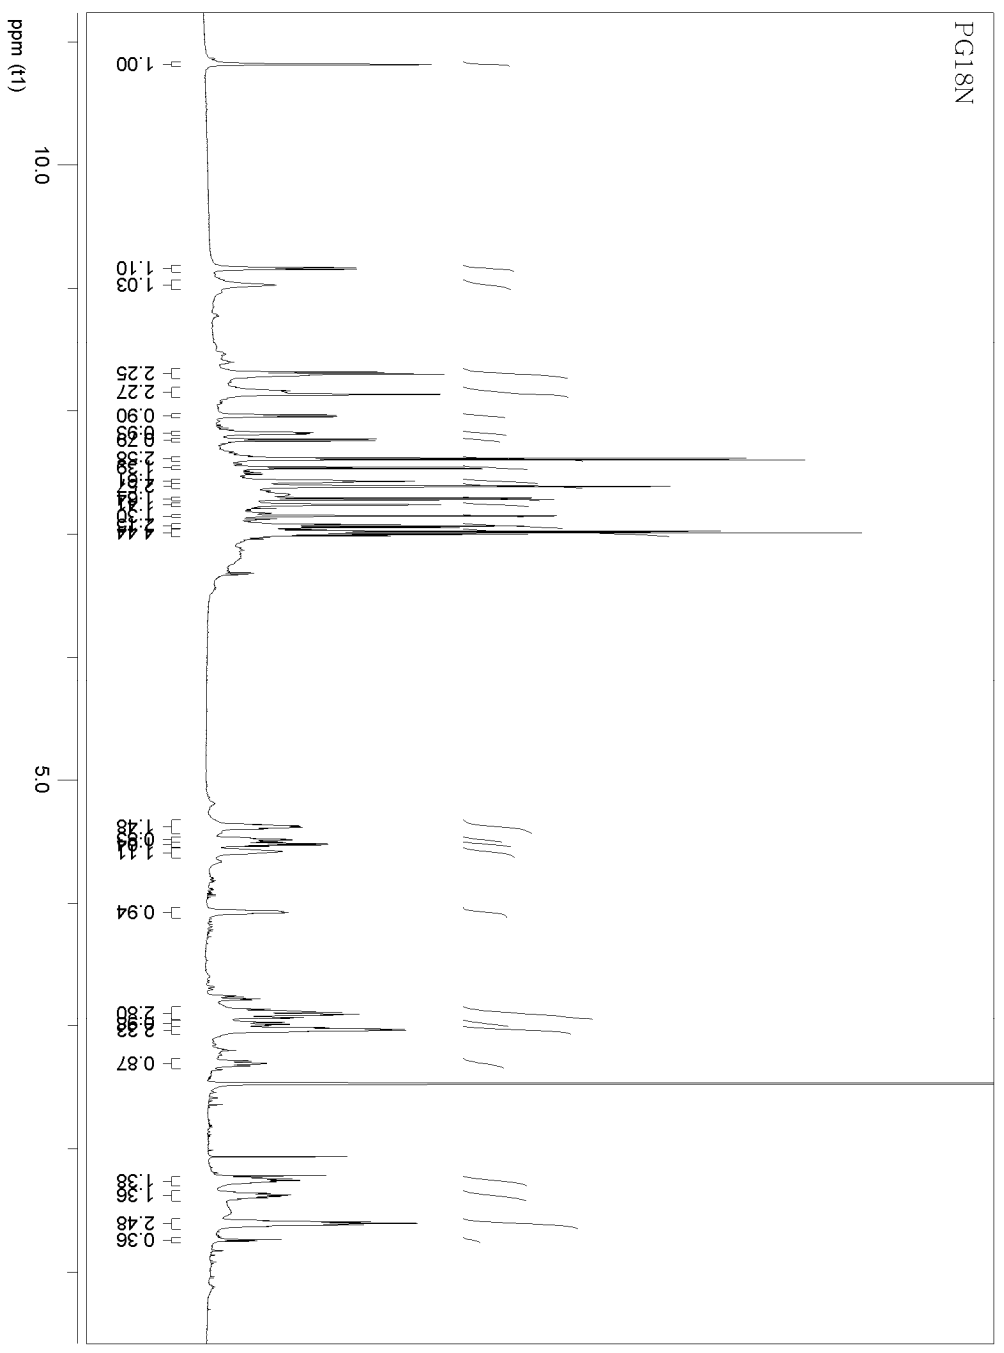

PG19N (65 observable hydrogens)

Amide and aromatic hydrogens (38)

8.99 (s, 1H)

8.76 (d,  $J = 5.75$  Hz, 1H)

8.73 (m, 2H)

8.51 (d,  $J = 7.48$  Hz, 1H)

8.45 (d,  $J = 7.83$  Hz, 1H)

8.24 (m, 2H)

8.07 (t,  $J = 2.22$  Hz, 1H)

7.85 (m, 6H)

7.76 (m, 2H)

7.69 (m, 3H)

7.48 (m, 4H)

7.37 (m, 6H)

7.29 (m, 2H)

7.04 (m, 1H)

6.95 (m, 2H)

6.86 (m, 1H)

6.58 (m, 2H)

$\alpha$ -Hydrogens (7)

4.88 (dt,  $J = 8.30, 6.07$  Hz, 1H)

4.50 (m, 1H)

4.39 (m, 1H)

4.32 (m, 1H)

4.22 (m, 1H)

4.09 (m, 1H)

3.65 (m, 1H)

Side chain hydrogens (20)

3.11 (m, 6H)

2.97 (m, 1H)

2.74 (m, 3H)

2.20 (m, 1H)

1.99 (m, 1H)

1.87 (m, 1H)

1.79 (m, 1H)

1.71 (m, 1H)

1.32 (m, 2H)

1.01 (m, 3H)



PG19N

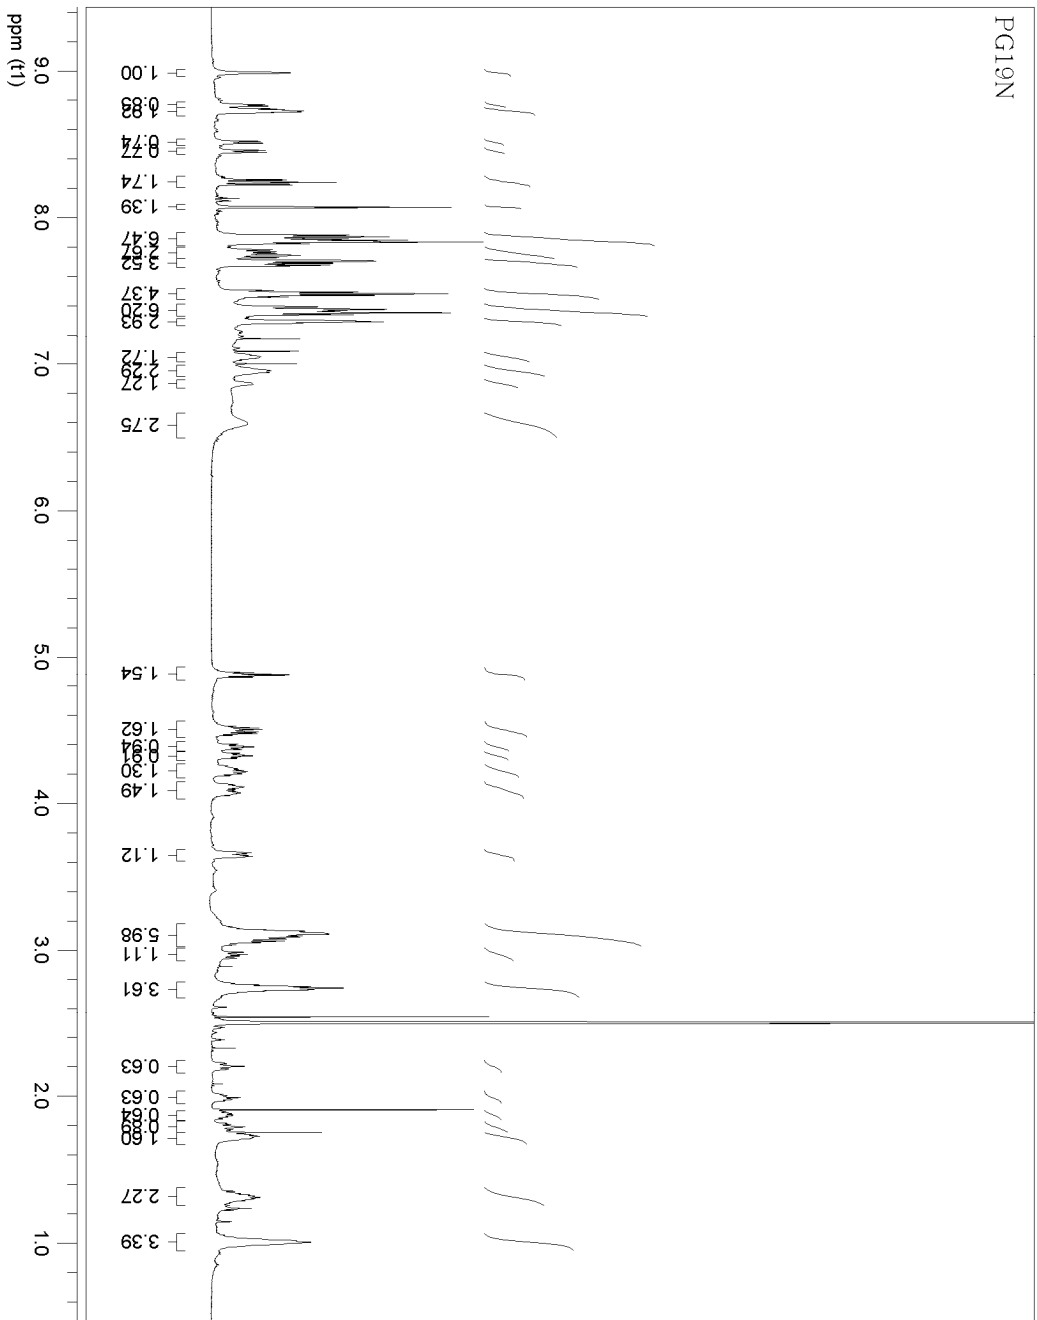

PG30N (45 observable hydrogens)

Amide and aromatic hydrogens (27)

8.99 (broad s, 1H)

8.84 (d,  $J = 8.04$  Hz, 1H)

8.61 (d,  $J = 5.63$  Hz, 1H)

8.40 (d,  $J = 7.01$  Hz, 1H)

8.27 (dd,  $J = 8.84, 2.55$  Hz, 1H)

8.15 (d,  $J = 2.56$  Hz, 1H)

7.82 (d,  $J = 7.61$  Hz, 1H)

7.75 (d,  $J = 7.39$  Hz, 1H)

7.70 (d,  $J = 9.05$  Hz, 1H)

7.41 (broad s, 1H)

7.36 (broad s, 1H)

7.33 (broad s, 1H)

7.23 (m, 8H)

7.15 (m, 7H)

$\alpha$ -Hydrogens (6)

4.90 (q,  $J = 7.88$  Hz, 1H)

4.40 (q,  $J = 7.20$  Hz, 1H)

4.34 (m, 2H)

3.89 (m, 1H)

3.65 (m, 1H)

Side chain hydrogens (12)

3.11 (m, 1H)

3.05 (m, 2H)

2.93 (m, 3H)

2.83 (q,  $J = 6.71$  Hz, 2H)

1.54 (m, 1H)

1.21 (m, 1H)

1.02 (m, 2H)

PG30N

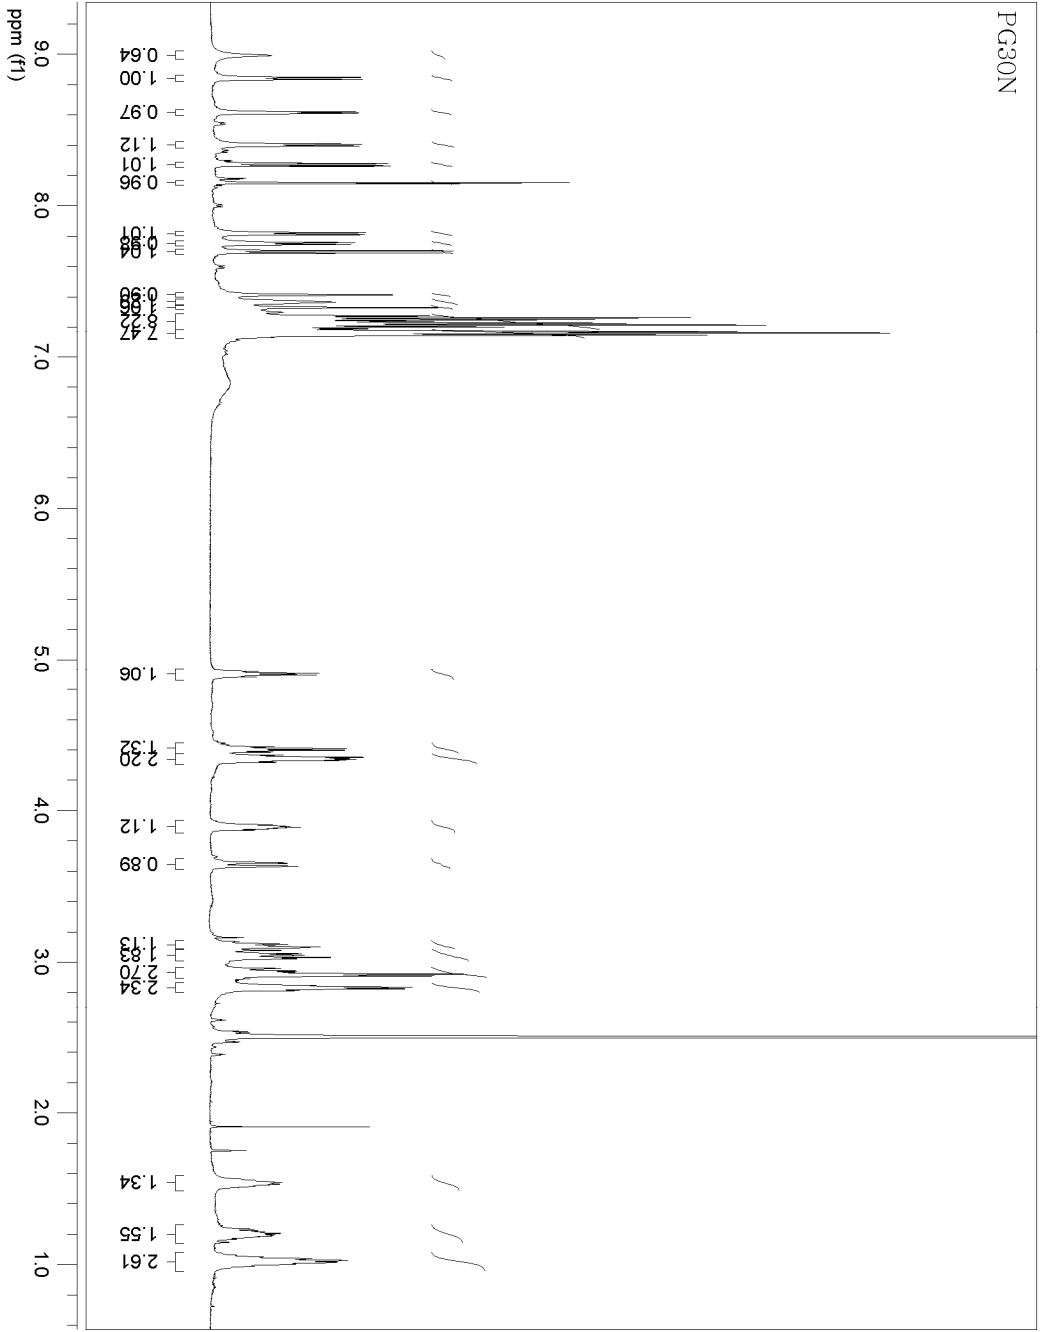

Supplement: NIHMS105631-supplement-supplemental_material.pdf [file NIHMS105631-supplement-supplemental_material.pdf]
